# Supplementary material for: MOF-Derived ZrO2-Supported Bimetallic Pd–Ni Catalyst for Selective Hydrogenation of 1,3-Butadiene
Source: MDPI journal article supplement (doi:10.3390/molecules29102217), 2024-05-09
Supplement: s1 [file s1]

# MOF-Derived ZrO<sub>2</sub>-Supported Bimetallic Pd–Ni Catalyst for Selective Hydrogenation of 1,3-Butadiene

Ying Liu, Lili Liu\*, Leyuan Wang, Miaoliang Zang, Lei Li and Yunkai Zhang

School of Chemistry & Chemical Engineering and Environmental Engineering, Weifang University, Weifang 261061, P.R. China; liuying@wfu.edu.cn (Y.L.); 15264543037@163.com (L.W.); 13356710254@163.com (M.L.); 15863610289@163.com (L.L.); 17753624747@163.com (Y.Z.)

\*Correspondence: liulili122@126.com (L.L.)

## 1. Materials and Methods

### 1.1 Materials

PdCl<sub>2</sub> (Pd≥59.5%), ZrCl<sub>4</sub> (98%), 4,4'-biphenyl dicarboxylic acid (H<sub>2</sub>bpdc, 97%), and acetic acid (99.5%) were obtained from Innochem Science & Technology Co. Ltd. (Beijing, China). Ni(NO<sub>3</sub>)<sub>2</sub>·6H<sub>2</sub>O (99.99%), N,N'-dimethylformamide (DMF, 99.5%), cetyltrimethylammonium bromide (CTAB, 99.0%), methanol (99.5%), and ethanol (99.7%) were purchased from Aladdin Reagent Co. Ltd. (Shanghai, China). 1,3-butadiene/N<sub>2</sub> (1.0vol%) and H<sub>2</sub> (99.99%) were supplied by Hengan Gas factory (Anqiu, China).

### 1.2 Characterization and Equipment

The samples were characterized by powder X-ray diffraction (PXRD, Brüker D8, Germany) using Cu K $\alpha$  radiation ( $\lambda = 1.54060 \text{ \AA}$ ), X-ray photoelectron spectroscopy (XPS, AXIS ULTRADLD, Shimadzu, Japan), and inductively coupled plasma optical emission spectrometry (ICP-OES, Optima 5300DV, Perkin-Elmer, USA). The morphologies of the UiO-67-CTAB(*n*) (*n*=0, 3, 8, 13, 18) were monitored by scanning electron microscopy (SEM, Quanta 450 FEI, Graz, Austria) and transmission electron microscopy (TEM, Jeol JEM-1210, Jeol, Tokyo, Japan). Energy dispersive X-ray spectroscopy (EDS) was performed on the X-MaxN 80T IE250 instrument (Oxford, UK). Textural properties of the samples were investigated through N<sub>2</sub> sorption at 77 K and were performed utilizing an automatic physical adsorption instrument (ASAP2460, Atlanta, Georgia, USA). The samples were treated at 150°C for 18 h under vacuum (0.1 MPa) before measurements. The specific areas and pore size distributions were determined using Brunauer-Emmett-Teller (BET) method and density functional theory (DFT) method, respectively. Raman spectra of PdNi/UiO-67-CTAB(3)-A500 catalyst after reaction at 40°C for 60 h on stream were obtained using a Horiba LabRAM HR Evolution Raman microscope (Japan). Raman spectra were obtained using a laser power of 2 mW at  $\lambda_{\text{exc}}=532 \text{ nm}$  with a collection time of 40 s by averaging 20 scans. The thermogravimetric analysis measurements were performed on a Rigaku TG-DTA 8122 simultaneous thermal analyzer (Japan) with a heating rate of 10°C/min from room temperature to 1000°C in Air atmosphere.

**Table S1.** The actual metal content of as-synthesized catalysts analyzed by ICP-OES.

| entry | catalyst                  | Pd content<br>(wt%) | Ni content<br>(wt%) | Zr content<br>(wt%) |
|-------|---------------------------|---------------------|---------------------|---------------------|
| 1     | PdNi/UiO-67-CTAB(0)-A500  | 6.2                 | 5.7                 | 49.8                |
| 2     | PdNi/UiO-67-CTAB(3)-A500  | 6.5                 | 5.4                 | 49.4                |
| 3     | PdNi/UiO-67-CTAB(8)-A500  | 6.4                 | 5.5                 | 49.4                |
| 4     | PdNi/UiO-67-CTAB(13)-A500 | 6.5                 | 5.4                 | 49.2                |
| 5     | PdNi/UiO-67-CTAB(18)-A500 | 6.7                 | 5.5                 | 49.9                |

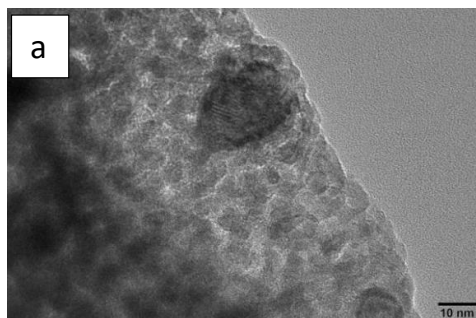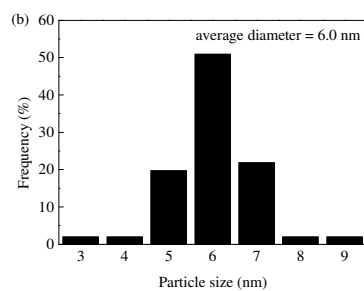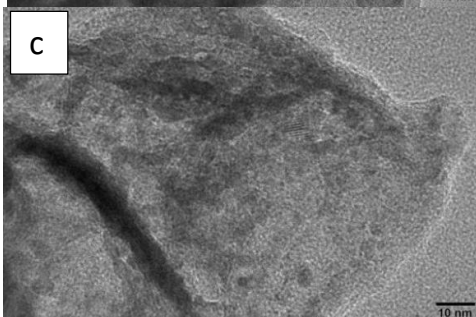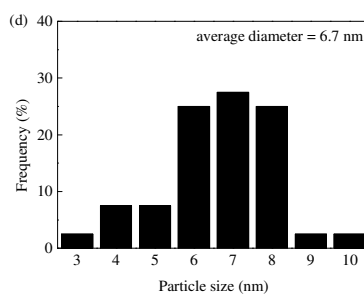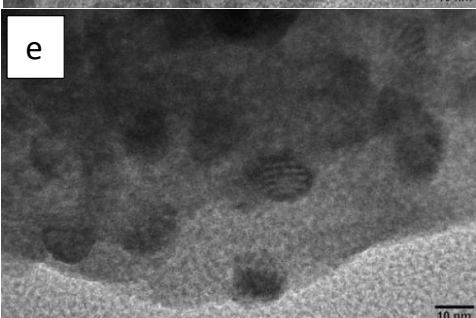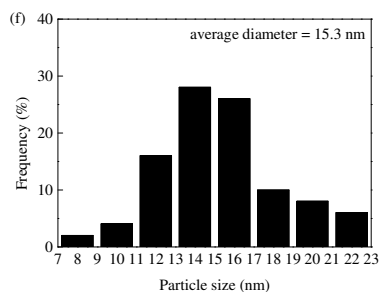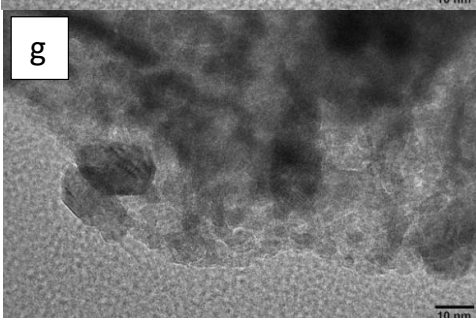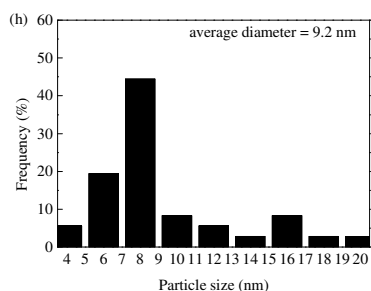

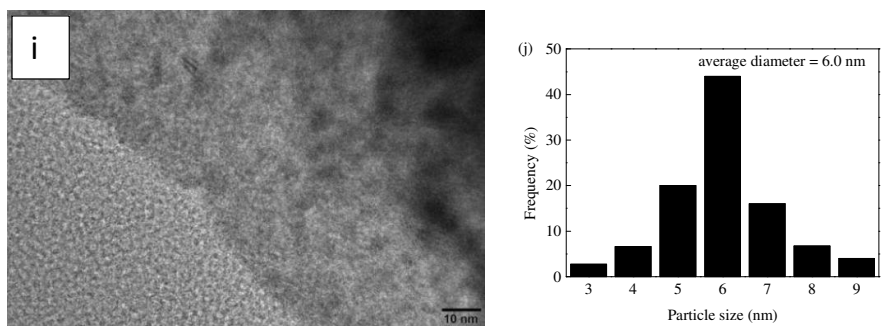

**Figure S1.** TEM photographs and PdNi nanoparticle distributions of PdNi/Uio-67-CTAB(0)-A500 (a, b), PdNi/Uio-67-CTAB(3)-A500 (c, d), PdNi/Uio-67-CTAB(8)-A500 (e, f), PdNi/Uio-67-CTAB(13)-A500 (g, h), PdNi/Uio-67-CTAB(18)-A500 (i, j)
